# Supplementary material for: The Effects of Expectations and Worries on the Experience of COVID-19 Symptoms
Source: bioRxiv or medRxiv preprint supplement (doi:10.1101/2023.01.26.23284911), 2023-01-30
Supplement: Supplementary file [file media-1.pdf]

## **The Effects of Expectations and Worries on the Experience of COVID-19 Symptoms**

Titilola Akintola<sup>1</sup>, Joyce Chung<sup>2</sup>, Lauren Atlas<sup>1,2,3</sup>

<sup>1</sup>Section on Affective Neuroscience and Pain, National Center for Complementary and Integrative Health, NIH, Bethesda, MD, USA

<sup>2</sup>National Institute of Mental Health, NIH, Bethesda, MD, USA

<sup>3</sup>National Institute on Drug Abuse, NIH, Baltimore, MD, USA

Corresponding Author:

Full name: Titilola Akintola, PhD

Department: Affective Neuroscience and Pain, National Center for Complimentary and Integrative Health

Institute/University/Hospital: National Institutes of Health

Street Name & Number: 10 Center Drive, Building 10, Rm. 4-1741

City, State, Postal code, Country: Bethesda, MD 20892

Tel: 301-827-0214

E-mail: titilola.akintola@nih.gov

Keywords: Nocebo; COVID-19; Expectations; Mental health; Health Anxiety.

## **ABSTRACT**

**Introduction:** The COVID-19 pandemic has been shown to have profound effects on both mental and physical health. Distress and widespread uncertainty about global events and personal risk are associated with increased worry and negative expectations that impact physical health. Thus, the current pandemic poses a possibility for the experience of nocebo effects.

**Objective:** To evaluate the likelihood of nocebo-induced COVID-19 symptoms in a US sample.

**Methods:** An online study on the mental health impact of COVID-19 asked participants to complete a set of biweekly surveys over a 6-month period between April 2020 and May 2021. We focus on responses from 3,027 individuals who reported never testing positive for COVID-19. We assessed the association between two types of worry and self-reported symptoms of COVID-19. We used multi-level models to examine variations across and within participants over time. We further investigated the effects of pre-existing health conditions and mental health status.

**Results:** There was a positive association between symptoms and both general ( $b= 2.56, p<0.01$ ) and personal worry ( $b=2.77, p<0.01$ ). However, worry reported at one timepoint was not specifically associated with symptoms reported two weeks later ( $p = 0.63, p=0.56$ ). We also found that a greater number of prior clinical comorbidities and greater mental health burden were significant predictors of symptom reporting.

**Conclusions:** These results suggest that increased worries during the COVID-19 pandemic were associated with greater symptoms. Further studies investigating worry and symptoms in populations with confirmed negative COVID-19 tests or isolated populations will be needed to isolate the occurrence of true nocebo effects during the pandemic.

**Keywords:** Nocebo; COVID-19; Expectations; Mental health; Health Anxiety

| <b>Table 2. Pearson Correlations of Predictors and Outcome Variables</b> |                             |                            |                                  |                                  |
|--------------------------------------------------------------------------|-----------------------------|----------------------------|----------------------------------|----------------------------------|
|                                                                          | AGE                         | Female SEX                 | Number of Physical Comorbidities | Mental Health Burden Score (PPS) |
| <b>Average General Worry</b>                                             | r = -0.042,<br>p=0.02*      | r = 0.14,<br>p < 0.001***  | r = 0.104,<br>p < 0.001***       | r = 0.258,<br>p < 0.001***       |
| <b>Average Personal Worry</b>                                            | r = 0.027,<br>p=0.15        | r = 0.115,<br>p < 0.001*** | r = 0.179,<br>p < 0.001***       | r = 0.251,<br>p < 0.001***       |
| <b>Average Proportion of COVID-19 Symptoms Reported</b>                  | r = -0.092,<br>p < 0.001*** | r = 0.1,<br>p < 0.001***   | r = 0.197,<br>p < 0.001***       | r = 0.333,<br>p < 0.001***       |

## **Baseline Study Measures**

### ***(Measures Completed Upon Study Enrollment):***

- Demographics Questionnaires
  
- A Clinical History Checklist
  
- Functional Status via World Health Organization Disability Assessment Schedule II (WHODAS) Functional Status<sup>12</sup>
  
- Psychiatric and Family History via Family Interview for Genetic Studies Scale (modified FIGS)<sup>7</sup>
  
- The Alcohol Use Disorder Identification Test (AUDIT)<sup>1</sup>
  
- Drug Use (DSM- 5 Level 2 Substance Use – Adult)<sup>8</sup>

### **Repeated / Biweekly Measures:**

#### ***(Measures Completed at Enrollment and Biweekly throughout Study duration):***

- Kessler-5 Distress Scale<sup>5</sup>
  
- Loneliness Measure via the (3-Item Loneliness Scale)<sup>4</sup>
  
- DSM-5 Self-Rated Level 1 Cross-Cutting Symptom Measure- Adult<sup>6</sup>
  
- Study-specific COVID-19-related responses and circumstances survey (Psychosocial Impact of COVID-19 survey (Full survey here: <https://tools.niehs.nih.gov/dr2/index.cfm/resource/22587>)).

**End of Study Measures:**

*(Measures Completed at Final Timepoint)*

- Chronic Pain Graded Scale (CPGS)<sup>13</sup>
  
- Brief Trauma Questionnaire (BTQ)<sup>10</sup>
  
- Social Support (PROMIS Instrumental Support)<sup>3</sup>
  
- Emotional Support (PROMIS Emotional Support)<sup>3</sup>
  
- Personality Survey (BFI-10)<sup>9</sup>
  
- Motivation Survey (BISBAS)<sup>2</sup>
  
- Brief Resilience Scale (BRS)<sup>11</sup>

## References

1. Babor TF, Higgins-Biddle J, Saunders J, Monteiro M. AUDIT: The Alcohol Use Disorders Identification Test. Guidelines for use in primary care, Geneva. World Health Organization. 2001
2. Carver, C. S., & White, T. L. (1994). Behavioral inhibition, behavioral activation, and affective responses to impending reward and punishment: the BIS/BAS scales. *Journal of personality and social psychology*, 67(2), 319.
3. Cella D, Yount S, Rothrock N, Gershon R, Cook K, Reeve B, Ader D, Fries JF, Bruce B, Rose M. The Patient-Reported Outcomes Measurement Information System (PROMIS): progress of an NIH Roadmap cooperative group during its first two years. *Med Care*. 2017;45(5):S3-11.
4. Hughes ME, Waite LJ, Hawkey LC, Cacioppo JT. A Short Scale for Measuring Loneliness in Large Surveys: Results From Two Population-Based Studies. *Res Aging*. 2004;26(6):655-672. doi:10.1177/0164027504268574 17
5. Kessler RC, Andrews G, Colpe LJ, et al. Short screening scales to monitor population prevalences and trends in non-specific psychological distress. *Psychol Med*. Aug 2002;32(6):959-76. doi:10.1017/s0033291702006074 16
6. Mahoney MR, Farmer C, Sinclair S, Sung S, Dehaut K, Chung JY. Utilization of the DSM-5 Self-Rated Level 1 Cross-Cutting Symptom Measure-Adult to Screen Healthy Volunteers for Research Studies. *Psychiatry Res*. Jan 27 2020;286:112822. doi:10.1016/j.psychres.2020.112822 18.
7. Maxwell. M. Family Interview For Genetic Studies: Manual for The FIGS. Clinical Neurogenetics Branch, Intramural Research Program, NIMH.  
<https://www.nimhgenetics.org/interviews/figs/>
8. Online assessment measures [WWW document]. American Psychiatric Association.  
<https://www.psychiatry.org/psychiatrists/practice/dsm/educational-resources/assessment-measures>

9. Rammstedt B, John OP. Measuring personality in one minute or less: A 10-item short version of the Big Five Inventory in English and German. *Journal of research in Personality*. 2007 Feb 1;41(1):203-12.
10. Schnurr, P., Vielhauer, M., Weathers, F., & Findler, M. (1999). Brief Trauma Questionnaire (BTQ) [Database record]. APA PsycTests.
11. Smith, B. W., Dalen, J., Wiggins, K., Tooley, E., Christopher, P., & Bernard, J. (2008). The brief resilience scale: assessing the ability to bounce back. *International journal of behavioral medicine*, 15(3), 194-200.
12. Üstün, T. B., Kostanjsek, N., Chatterji, S., & Rehm, J. (Eds.). (2010). *Measuring health and disability: Manual for WHO disability assessment schedule WHODAS 2.0*. World Health Organization.
13. Von Korff M, Ormel J, Keefe FJ, Dworkin SF. Grading the severity of chronic pain. *Pain* 1992;50:133-49.
